# Supplementary material
Source: PubMed Central journal article supplement (PMC6785233)
Supplement: ehp4200.smcontents.508.pdf [file ehp4200.smcontents.508.pdf]

**Note to readers with disabilities:** *EHP* strives to ensure that all journal content is accessible to all readers. However, some figures and Supplemental Material published in *EHP* articles may not conform to [508 standards](#) due to the complexity of the information being presented. If you need assistance accessing journal content, please contact [ehp508@niehs.nih.gov](mailto:ehp508@niehs.nih.gov). Our staff will work with you to assess and meet your accessibility needs within 3 working days.

### **Supplemental Material**

#### **Linking Bisphenol S to Adverse Outcome Pathways Using a Combined Text Mining and Systems Biology Approach**

Jean-Charles Carvaillo, Robert Barouki, Xavier Coumoul, and Karine Audouze

#### **Table of Contents**

**Table S1.** List of the synonyms and identifiers for BPS.

**Table S2.** List of the 109 publications mentioning BPS, and used to run the *AOP-helpFinder* tool to identify links between BPS and KE/MIE/AO.

**Table S3.** List of the diseases (based on the MESH terms) associated to bisphenol S (BPS).
